# Supplementary material for: Host Clustering of Campylobacter Species and Other Enteric Pathogens in a Longitudinal Cohort of Infants, Family Members and Livestock in Rural Eastern Ethiopia
Source: Research Square preprint supplement (doi:10.21203/rs.3.rs-5736322/v1), 2025-03-18
Supplement: Supplementary file 1 [file d058186021ca40ccc9e6318a.xlsx]

## Sheet: Sheet1
Campylobacter species	Average Nucleotide Count Across Sample Types							Average Reads Per million (RPM) Across Sample Types							Average Nucleotide Alignment length Across Sample Types
	Infant stool	Mother stool	Sibling stool	Cattle feces	Goat feces	Sheep feces	Chicken feces	Infant stool	Mother stool	Sibling stool	Cattle feces	Goat feces	Sheep feces	Chicken feces	Infant stool	Mother stool	Sibling stool	Cattle feces	Goat feces	Sheep feces	Chicken feces
C. armoricus	15	19.25	20					3	4.075	3.67143					102.8	117.35	134.529
C. avium	25	89.4286	114.111	11.5	20.25	13		4.8	19.2286	21.2222	2.25	4.25	2.8		94.55	126.457	137.211	61.15	85.175	70.75
C. blaseri		22	11.6667	16	11	11			3.7	2.03333	3.3	2.3	2.2			70.9	95.1333	83	68.3	53.4
C. canadensis		21	14.25	13	14	15			4.7	2.625	3.03333	3	3.1			118.15	84.1	72.3333	91.7	130.4
C. corcagiensis		12	18		10				2.7	3.53333		1.9				79.3	76.1667		82.3
C. cuniculorum	29	74	52.8889	10	17			5.8	16.15	9.81111	2.2				79.5	98.4	111.7	59.3
C. gracilis		36.3333	63.75		60	17.4667			8	12.2		13.3	3.83333			113.7	121.15		117.9	88.9333
C. helveticus	104.5	104.429	151.667					19.7833	22.3857	27.25					202.5	125.4	167.758
C. hepaticus		19.5	14.3333		42	39			4.4	2.5		8.96667	8.1			87.65	101.033		62.0333	50.4
C. hominis		17.6667	28.6						4.4	4.78						109.5	82.99
C. hyointestinalis	51.6667	44	53.7778	13.6667	13.625	21.25		9.5	4.4	8.2	3.2	3.0875	4.3125		166.667	144.2	171.856	70.9667	89.225	105.237
C. insulaenigrae	11	31	16.6667		13			2.1	4.4	3.16667		2.7			90.6	166.3	91.3		61.5
C. lanienae	20	26	44.4	19	55.2143	43.2941	10	4	4.4	7.18	3.88333	13.1214	9.74706	1.8	336.3	84.75	173.64	170.667	112.95	112.541	58.9
C. ornithocola	10		15.6667					2		2.7					125.6		112.667
C. peloridis		48.6667	25	11					4.4	4.625	2.1					153.7	97.825	66.4
C. sp. RM16704		33	23.75	11	20	10			7.35	4.4	3.3	3.4	2.1			132.9	90.95	57.7	126	108
C. sputorum	29	18.3333	34.6667	19	14	14		5.8	4	5.33333	3.95	2.65	3.2		117.6	76.8667	73.75	79.75	62.05	57.6
C. troglodytis		10	12						2.3	1.9						413	296.6
C. ureolyticus	10.5	15.3333	20	13.1667	14	14	11	1.85	3.06667	3.53333	2.78333	3.03333	2.96667	2	89.1	106.167	76.4667	75.3833	71.9333	72.6	84.6
