# Supplementary material for: Host Clustering of Campylobacter Species and Other Enteric Pathogens in a Longitudinal Cohort of Infants, Family Members and Livestock in Rural Eastern Ethiopia
Source: Research Square preprint supplement (doi:10.21203/rs.3.rs-5736322/v1), 2025-03-18
Supplement: Supplementary file 1 [file fc94fd8d58780188c67c4016.pdf]

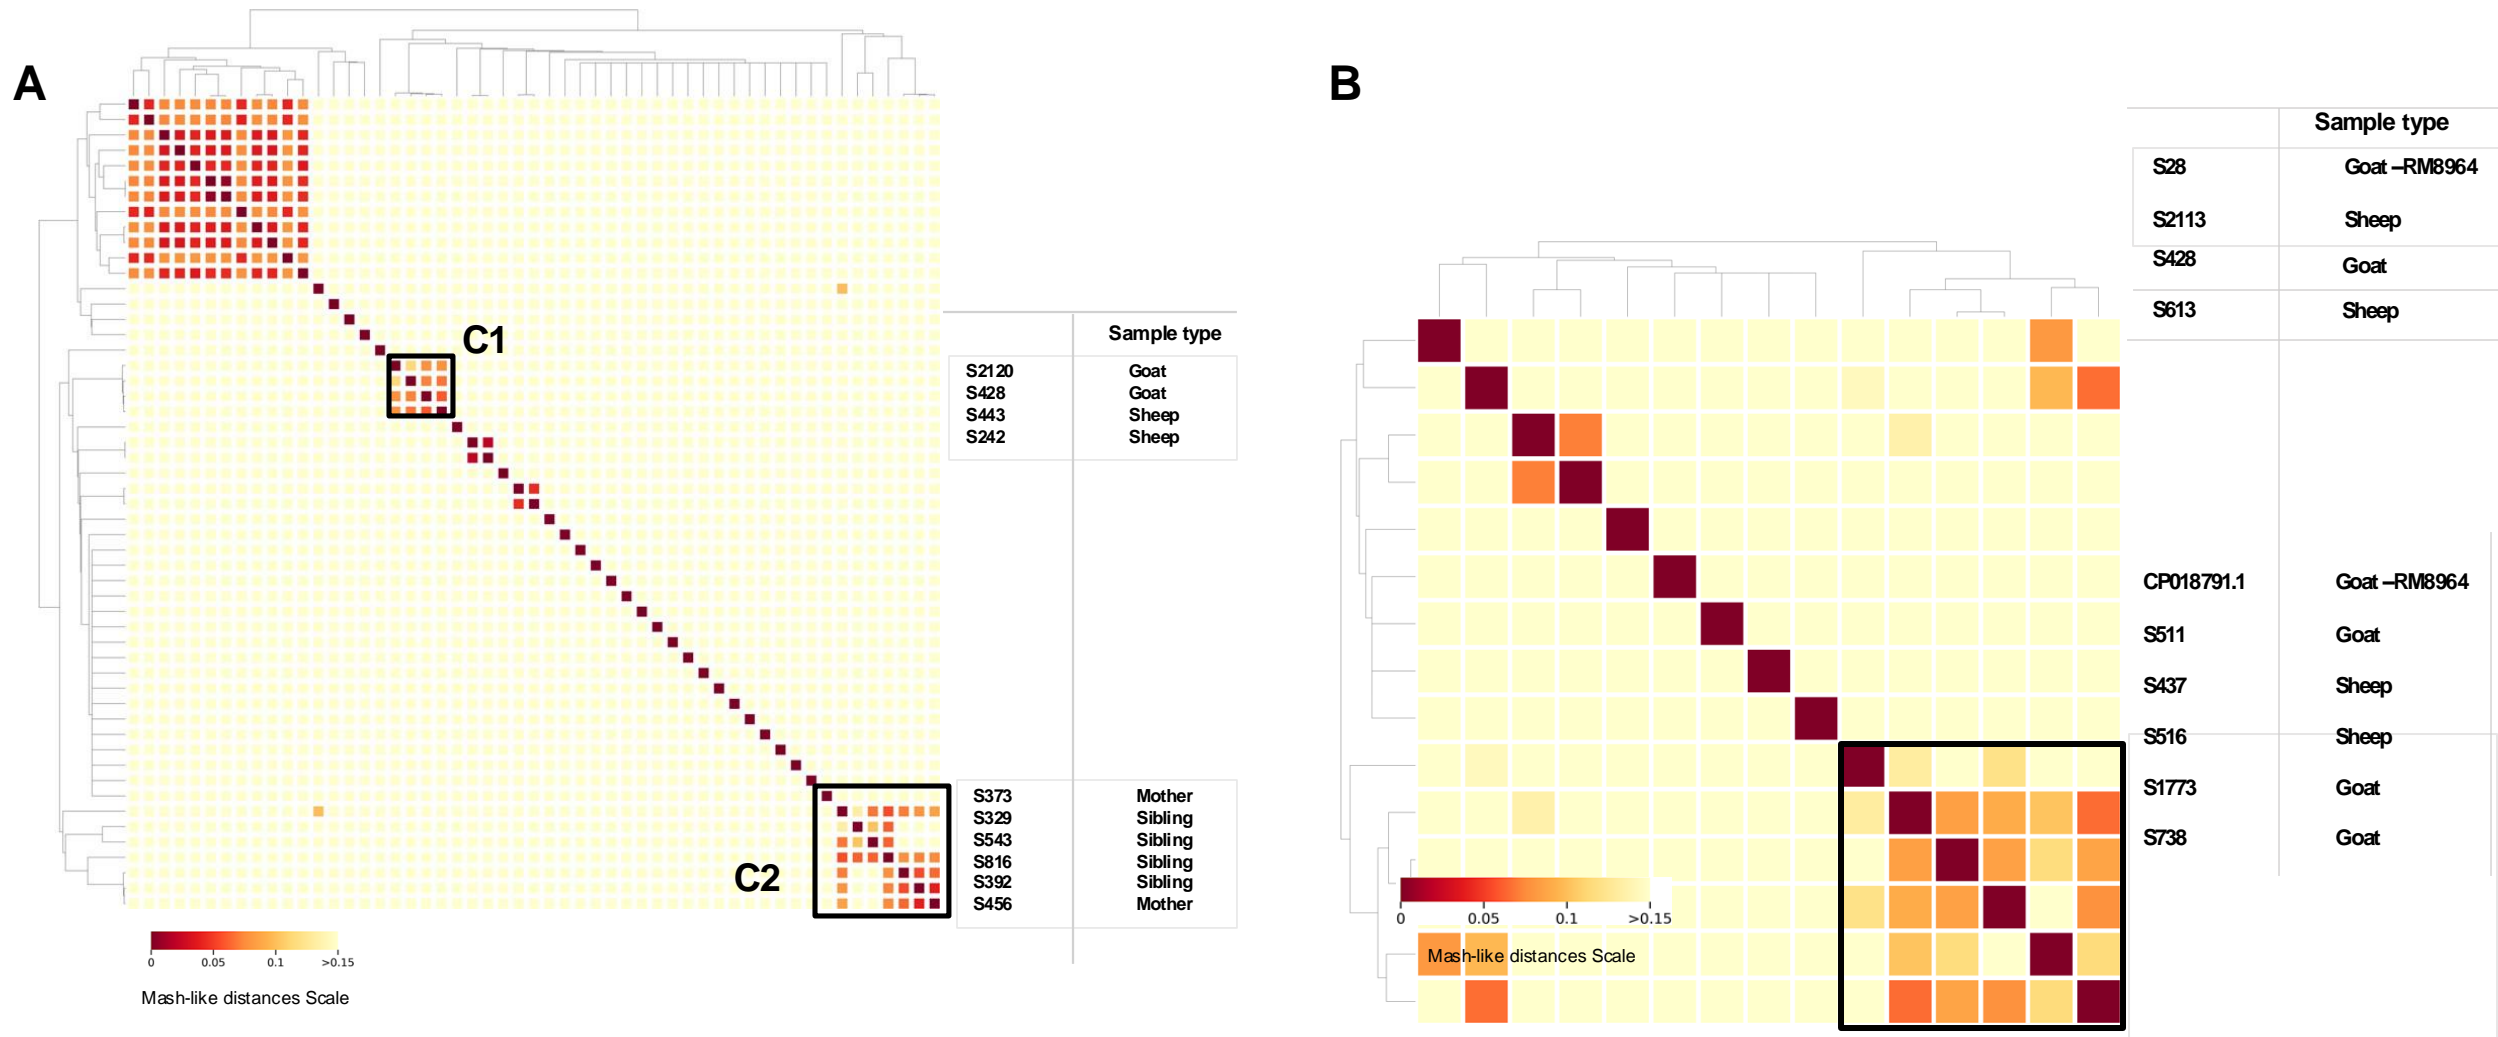

**Figure S1.** Pairwise Mash-like distances for A) *Campylobacter concisus* B) *Campylobacter vicugnae*. Each sample in the dataset was compared to itself and all other samples. The colors in the matrix represent the range of Mash-like distances (refer to the scale). The diagonal line compares each sample to itself, resulting in dark red squares, indicating zero differences between the sequences. Black boxes are used to show clustering of samples (C1 and C2 in A), and on the right side, sample metadata, including samples and host species are utilized to support the genetic similarities observed in the metagenomic dataset.
