# Supplementary material for: Host Clustering of Campylobacter Species and Other Enteric Pathogens in a Longitudinal Cohort of Infants, Family Members and Livestock in Rural Eastern Ethiopia
Source: Research Square preprint supplement (doi:10.21203/rs.3.rs-5736322/v1), 2025-03-18
Supplement: Supplementary file 2 [file f3bb5aadaa066313096a32c1.xlsx]

## Sheet: Sheet6
S. Table 2. Campylobacter species detected in this study across the sample types; shaded species are minor species detected in addition to the 21 major Campylobacter species.
Infant stool	Mother stool	Sibling stool	Cattle feces	Goat feces	Sheep feces	Chicken feces
C. jejuni	C. coli	C. lari	C. vicugnae	C. sp. RM12175	C. rectus	C. pinnipediorum
C. concisus	C. geochelonis	C. fetus	C. showae	C. sp. 2014D-0216	C. californiensis	C. coli
Candidatus C. infans	C. mucosalis	C. coli	C. subantarcticus	C. vicugnae	C. sp. RM16192	C. jejuni
C. upsaliensis	C. volucris	C. geochelonis	C. curvus	C. showae	C. subantarcticus	C. lanienae
C. iguaniorum	C. jejuni	C. jejuni	C. pinnipediorum	C. curvus	C. coli	C. ureolyticus
C. armoricus	C. concisus	C. concisus	C. lari	C. lari	C. sp. RM12175
C. avium	Candidatus C. infans	Candidatus C. infans	C. fetus	C. jejuni	C. vicugnae
C. cuniculorum	C. upsaliensis	C. upsaliensis	C. coli	C. concisus	C. showae
C. helveticus	C. blaseri	C. ornithocola	C. jejuni	C. corcagiensis	C. lari
C. hyointestinalis	C. canadensis	C. blaseri	C. concisus	C. gracilis	C. jejuni
C. insulaenigrae	C. corcagiensis	C. canadensis	C. blaseri	C. hepaticus	C. concisus
C. lanienae	C. gracilis	C. corcagiensis	C. canadensis	C. insulaenigrae	C. gracilis
C. ornithocola	C. hepaticus	C. gracilis	C. peloridis	C. blaseri	C. hepaticus
C. sputorum	C. hominis	C. hepaticus	C. sp. RM16704	C. canadensis	C. blaseri
C. ureolyticus	C. peloridis	C. hominis	C. avium	C. sp. RM16704	C. canadensis
	C. sp. RM16704	C. peloridis	C. cuniculorum	C. avium	C. sp. RM16704
	C. troglodytis	C. sp. RM16704	C. hyointestinalis	C. cuniculorum	C. avium
	C. armoricus	C. troglodytis	C. lanienae	C. hyointestinalis	C. hyointestinalis
	C. avium	C. armoricus	C. sputorum	C. lanienae	C. lanienae
	C. cuniculorum	C. avium	C. ureolyticus	C. sputorum	C. sputorum
	C. helveticus	C. cuniculorum		C. ureolyticus	C. ureolyticus
	C. hyointestinalis	C. helveticus
	C. insulaenigrae	C. hyointestinalis
	C. lanienae	C. insulaenigrae
	C. sputorum	C. lanienae
	C. ureolyticus	C. sputorum
		C. ureolyticus
